# Supplementary material
Source: publisher figshare collection journal article supplement (https://karger.figshare.com/articles/dataset/_/5125174)
Supplement: Supplementary file 1 [file 1]

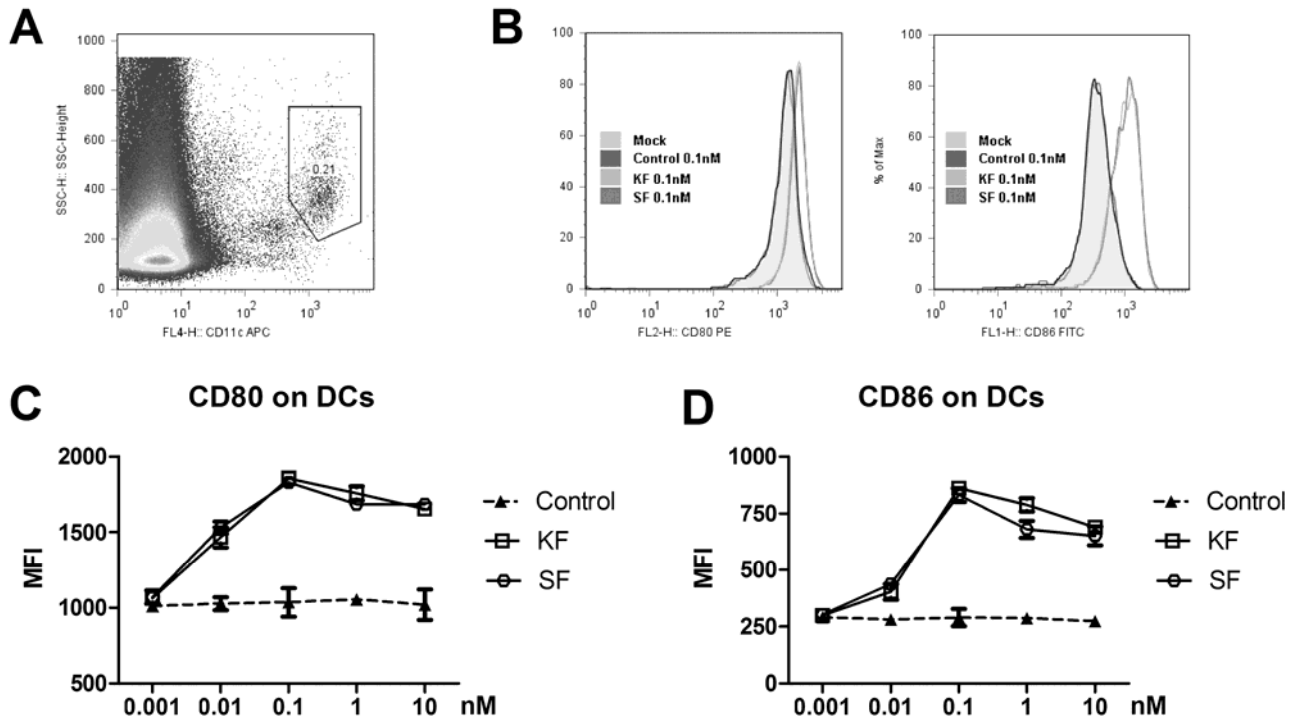

**Fig. S1.** The stimulatory effects of KF and SF through TLR5 pathway on splenic DCs. A, Splenic DCs were gated as 7AAD<sup>-</sup> CD11c<sup>high</sup> splenocytes. B, CD80 and CD86 expression levels on splenic DCs after 0.1nM flagellin stimulation. C and D, dose-dependence of CD80 and CD86 expression on CD11c<sup>high</sup> splenic DCs were analyzed by flow cytometry. Data are represented as the mean  $\pm$ SEM from triplicates of one representative of three experiments.

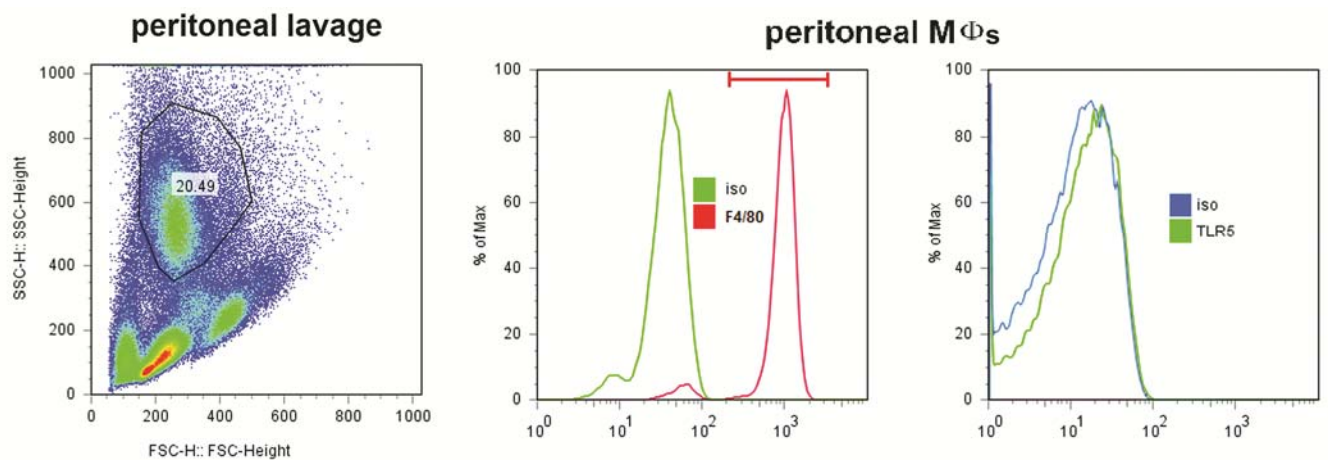

**Fig. S2.** TLR5 expression in peritoneal MΦs. 7AAD<sup>-</sup> F4/80<sup>+</sup> peritoneal cells were gated as peritoneal MΦs (left and middle) and express insignificant level of TLR5 (right). Data are presented as one experiment that repeated at least 3 times.

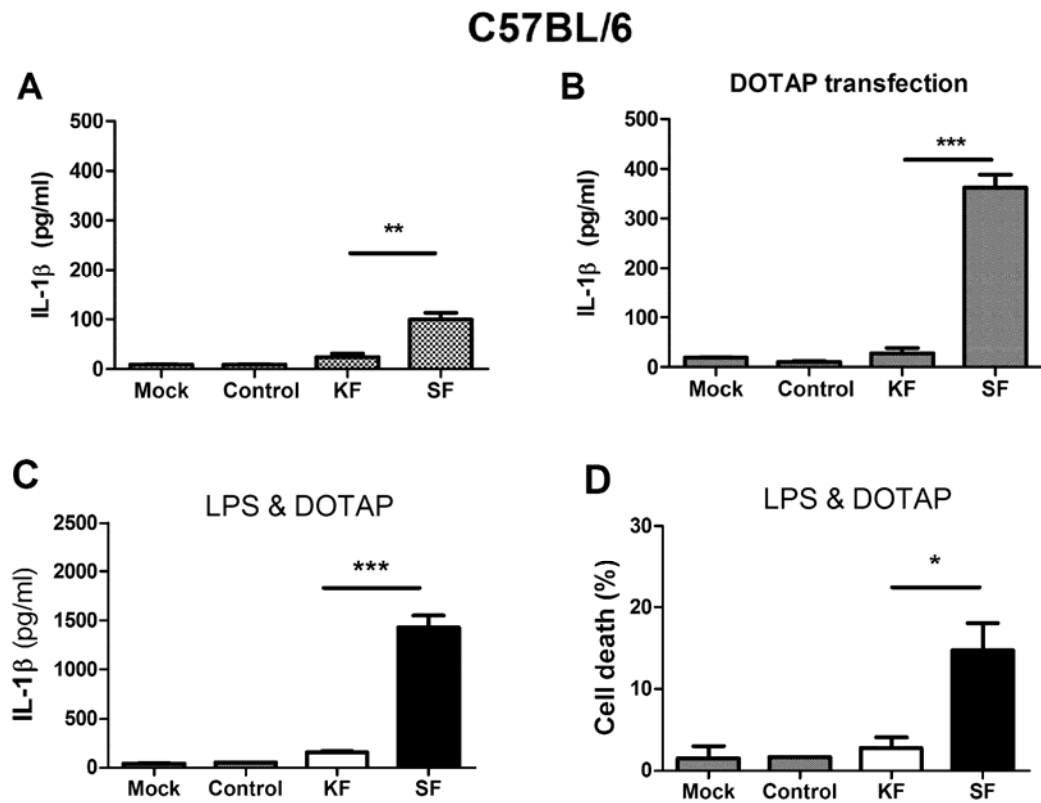

**Fig. S3** IL-1 $\beta$  secretion and cell death induced by flagellins in peritoneal macrophages derived from C57BL/6 mice. A and B, IL-1 $\beta$  secreted in cell culture supernatants were tested 20-h after 100 nM flagellin stimulation without or with tranfection reagent DOTAP. C and D, IL-1 $\beta$  secretion and cell death on C57BL/6 mice peritoneal macrophages pretreated with 50 ng/ml LPS for 3h and then with 100nM flagellin and DOTAP for 20h. Data are presented as the means  $\pm$  SEM from triplicates of one representative of three experiments.

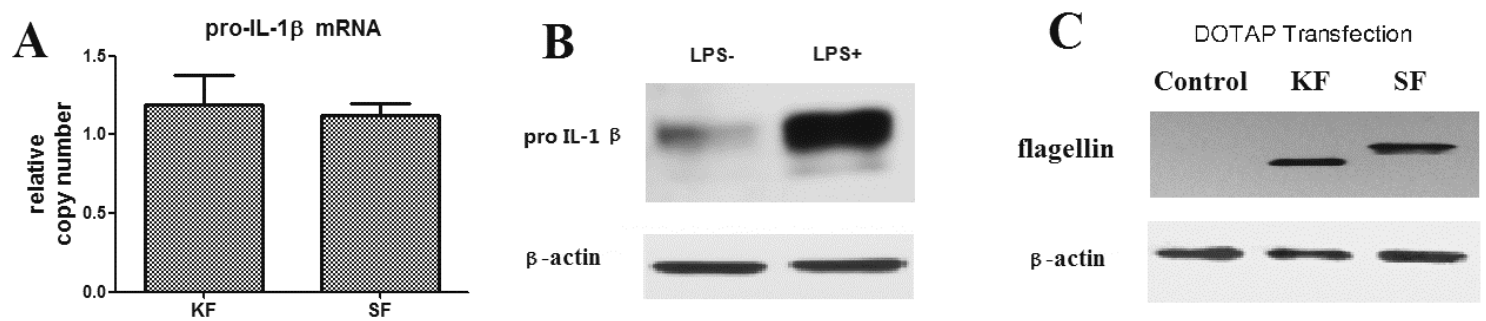

**Fig. S4.** The stimulatory effects of flagellins and LPS in peritoneal M $\Phi$ s. A, Pro-IL-1 $\beta$  mRNA levels in peritoneal M $\Phi$ s 3-h after 10 nM flagellin stimulation. B, Pro-IL-1 $\beta$  levels in cells lysate 3-h after 1 $\mu$ g/ml LPS stimulation. C, Flagellin levels in cells lysate 1-h after transfection of 100 nM flagellin. Data are presented of one representative of three experiments.

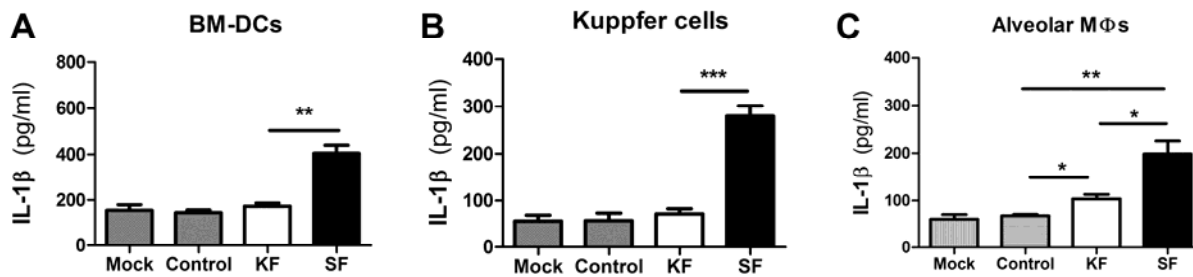

**Fig. S5.** IL-1 $\beta$  secretion induced by flagellin in BM-DCs, Kupffer cells, and Alveolar M $\Phi$ s. BM-DCs were prepared from the femurs of BALB/c mice by culture for 7 days with RPMI 1640 containing 10 % fetal bovine serum and recombinant mouse IL-4 plus GM-CSF as described previously [Inaba K, Swiggard WJ, Steinman RM, Romani N, Schuler G, Brinster C: Isolation of dendritic cells; in Coligan JE, et al. (eds): Current Protocols in Immunology 2009, chapter 3, unit 3.7.], and seeded at a density of  $5 \times 10^5$  cells / well in 24-well plates. Kupffer cells were isolated from C57BL/6 mice as described previously [Wu J, Meng Z, Jiang M, Zhang E, Trippler M, Broering R, Bucchi A, Krux F, Dittmer U, Yang D, Roggendorf M, Gerken G, Lu M, Schlaak JF: Toll-like receptor-induced innate immune responses in non-parenchymal liver cells are cell type-specific. Immunology 2010;129:363-374.], and seeded at a density of  $3 \times 10^5$  cells / well in 24-well plates. Alveolar M $\Phi$ s were collected from bronchoalveolar lavage fluids and seeded at a density of  $5 \times 10^4$  cells / well in 96-well plates. After LPS pretreatment for 3 h, the cells were transfected with 100 nM flagellins. The levels of IL-1 $\beta$  in the culture supernatants were determined 20 h after transfection. Data are presented as the means  $\pm$  SEM from triplicates of one representative of three experiments.

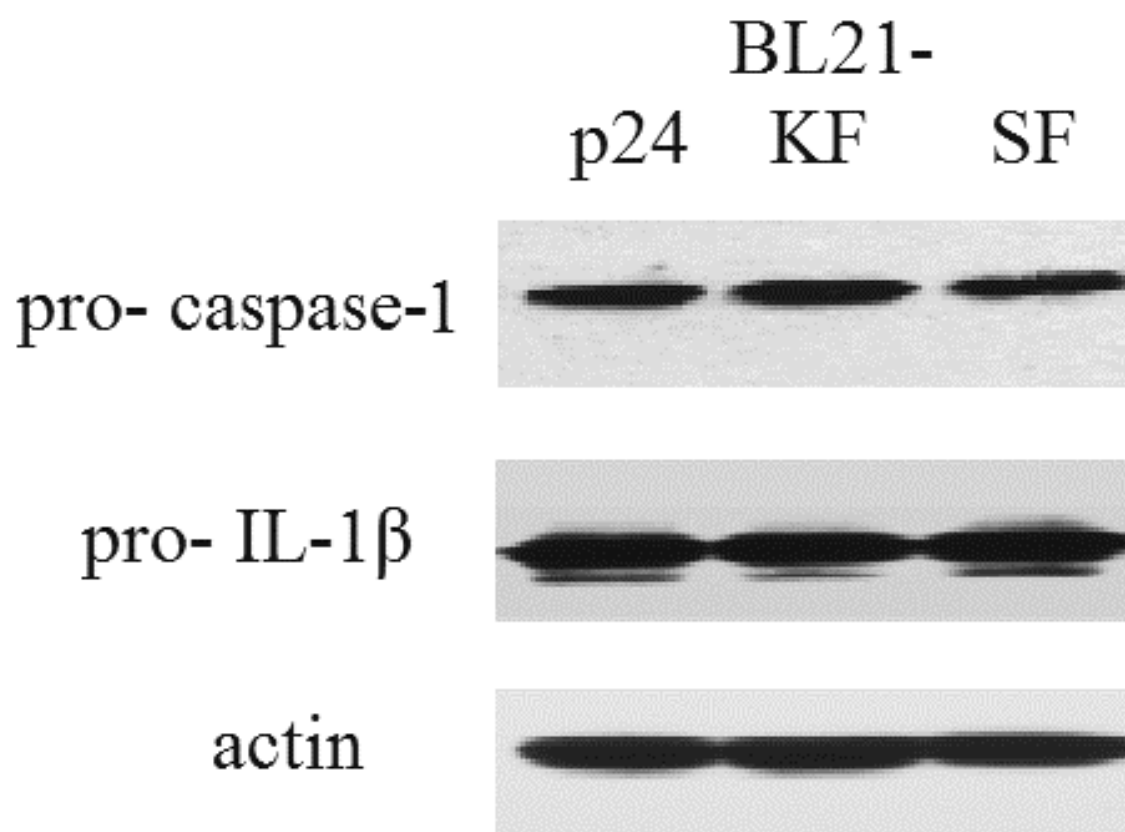

**Fig. S6.** The pro-IL-1 $\beta$  levels and pro-caspase-1 levels in cells lysate of peritoneal M $\Phi$ s 6-h after the exposure to bacteria. Data are presented as the means  $\pm$  SEM from triplicates of one representative of three experiments.
